# Supplementary material for: Mixed Neuroendocrine Non-Neuroendocrine Neoplasms: A Systematic Review of a Controversial and Underestimated Diagnosis
Source: J Clin Med. 2020 Jan 19;9(1):273. doi: 10.3390/jcm9010273 (PMC7019410; doi:10.3390/jcm9010273)
Supplement: Supplementary file 1 [file jcm-09-00273-s001.pdf]

## Supplementary Materails:

**Table S1.** Survival outcomes of patients with a diagnosis of mixed neuroendocrine non-neuroendocrine neoplasms in retrospective studies where median survival estimates by Kaplan-Meier analysis were not reached.

| Reference         | Total N patients | Median follow-up time | Localised stage                                                                                                                                                                                             | Advanced stage                                                                                                     |
|-------------------|------------------|-----------------------|-------------------------------------------------------------------------------------------------------------------------------------------------------------------------------------------------------------|--------------------------------------------------------------------------------------------------------------------|
| Nie L., 2016      | 14               | 17 m                  | <ul style="list-style-type: none"> <li>4 recurred and died after 8, 8, 10 and 11m</li> <li>8 free from recurrence and alive after 9, 12, 12, 12, 28, 30, 30 and 43m</li> <li>1 lost to follow-up</li> </ul> | 1 free from progression and alive after 18m                                                                        |
| Düzköylü Y., 2018 | 10               | 15m                   | <ul style="list-style-type: none"> <li>6 alive after 3, 10, 20, 26, 31, and 51m</li> <li>3 died after 3, 10 and 22m</li> </ul>                                                                              | 1 died after 5m                                                                                                    |
| La Rosa S., 2018  | 14               | 6.5 yrs               | <ul style="list-style-type: none"> <li>12 free from recurrence/progression and alive after 1, 1, 2, 2, 2, 4, 9, 11, 12, 12, 24 and 27 yrs</li> <li>2 lost to follow-up</li> </ul>                           |                                                                                                                    |
| Dulskas, A. 2019  | 9                | 17m                   | <ul style="list-style-type: none"> <li>3 alive after 20, 28 and 56m</li> </ul>                                                                                                                              | <ul style="list-style-type: none"> <li>2 alive after 11 and 18m</li> <li>4 died after 2, 11, 14 and 17m</li> </ul> |

yrs = years; m = months; N= number.

**Table S2.** Comparison of survival outcomes of mixed neuroendocrine non-neuroendocrine neoplasms with survival outcomes of other neoplasms from the same sites of origin.

| Reference             | Site                       | MiNEN vs NEC                                                      | MiNEN vs NET                                                   | MiNEN vs GCC                                                                                                                  |
|-----------------------|----------------------------|-------------------------------------------------------------------|----------------------------------------------------------------|-------------------------------------------------------------------------------------------------------------------------------|
| Shen C., 2016         | Stomach                    | In patients with radical resection, no difference in OS (p=0.102) | In patients with R0 resection, WD-NET have better OS (p<0.001) |                                                                                                                               |
| Lim S.M., 2016        | Stomach                    | No difference in OS (p=0.232)                                     |                                                                |                                                                                                                               |
| Park J.Y., 2014       | Stomach                    | No difference in RFS or in OS (p = not provided)                  |                                                                |                                                                                                                               |
| van der Veen A., 2018 | Stomach and oesophagus/OGJ | No difference in OS (p=0.403)                                     |                                                                |                                                                                                                               |
| Yang M., 2015         | Pancreas                   | No difference in OS (p=0.071)                                     | WD-NET have better OS than NEC/MiNEN (p<0.001)                 |                                                                                                                               |
| Basturk O., 2014      | Pancreas                   | MiNEN have better OS than NEC (p=0.0035)                          |                                                                |                                                                                                                               |
| Zheng Z., 2019        | Biliary tract              | No difference in RFS (p=0.715) or OS (p=0.670)                    |                                                                |                                                                                                                               |
| Brathwaite S., 2016   | Appendix                   |                                                                   | WD-NET have better OS than NEC/MiNEN (p<0.001)                 | GCC have better OS than MiNEN (p<0.001)                                                                                       |
| Brathwaite S., 2016   | GEP                        |                                                                   | WD-NET have better OS than NEC/MiNEN (p=0.007)                 | Trend (although not statistically significant, p=0.52) towards a better OS for GCC (13.2 years) compared to MiNEN (4.1 years) |
| Milione M., 2018      | GEP                        | No difference in OS (p=0.08)                                      |                                                                |                                                                                                                               |

MiNEN = mixed neuroendocrine non-neuroendocrine neoplasm; NEC = pure neuroendocrine carcinoma; NET = well differentiated neuroendocrine tumour; GCC = goblet cell carcinoid; WD = well differentiated; OS = overall survival; RFS = recurrence free survival; OGJ = oesophagogastric junction; GEP = gastroenteropancreatic tract.
